# Supplementary material for: Currencies of Mutualisms: Sources of Alkaloid Genes in Vertically Transmitted Epichloae
Source: Toxins (Basel). 2013 Jun 6;5(6):1064–88. doi: 10.3390/toxins5061064 (PMC3717770; doi:10.3390/toxins5061064)
Supplement: Supplementary File 1 — Supplementary Information (PDF, 147 KB) [file toxins-05-01064-s001.pdf]

# Supplementary Information

**Table S1.** *tubB* genes featured in Figure 3.

| Species                      | Isolate <sup>a</sup> | Host                                            | <i>tub2</i> |
|------------------------------|----------------------|-------------------------------------------------|-------------|
| <i>Epichloë amarillans</i>   | E273                 | <i>Agrostis hyemalis</i>                        | AF457466    |
| <i>E. amarillans</i>         | E57 = ATCC 200744    | <i>Ag. hyemalis</i>                             | KF042047    |
| <i>E. amarillans</i>         | E4668                | <i>Ag. hyemalis</i>                             | KF042042    |
| <i>E. amarillans</i>         | E1087                | <i>Elymus virginicus</i>                        | AF457478    |
| <i>E. amarillans</i>         | ATCC 200743          | <i>Sphenopholis obtusata</i>                    | L06958      |
| <i>E. amarillans</i>         | ATCC 201670          | <i>Sph. obtusata</i>                            | AF062426    |
| <i>Epichloë baconii</i>      | ATCC 76552           | <i>Agrostis stolonifera</i>                     | L06961      |
| <i>E. baconii</i>            | ATCC 90167           | <i>Agrostis tenuis</i>                          | L78279      |
| <i>E. baconii</i>            | ATCC 200746          | <i>Ag. tenuis</i>                               | AF250733    |
| <i>E. baconii</i>            | E1031 = ATCC 200745  | <i>Calamagrostis villosa</i>                    | KF042062    |
| <i>Epichloë brachyelytri</i> | ATCC 200752          | <i>Brachyelytrum erectum</i>                    | L78271      |
| <i>E. brachyelytri</i>       | ATCC 200753          | <i>Be. erectum</i>                              | AF250734    |
| <i>E. brachyelytri</i>       | ATCC 200754          | <i>Be. erectum</i>                              | AF250735    |
| <i>E. brachyelytri</i>       | ATCC 201560          | <i>Be. erectum</i>                              | AF250736    |
| <i>E. brachyelytri</i>       | ATCC 201561          | <i>Be. erectum</i>                              | AF062427    |
| <i>E. brachyelytri</i>       | E4804                | <i>Be. erectum</i>                              | KF042060    |
| <i>Epichloë bromicola</i>    | AL0814               | <i>Agropyron repens</i>                         | GU325782    |
| <i>E. bromicola</i>          | AL9121/1             | <i>Bromus erectus</i>                           | AY033378    |
| <i>E. bromicola</i>          | AL9607               | <i>Bro. erectus</i>                             | AY033366    |
| <i>E. bromicola</i>          | AL9608               | <i>Bro. erectus</i>                             | AY033381    |
| <i>E. bromicola</i>          | AL9630               | <i>Bro. erectus</i>                             | AY033382    |
| <i>E. bromicola</i>          | AL9631               | <i>Bro. erectus</i>                             | AY033383    |
| <i>E. bromicola</i>          | AL9632               | <i>Bro. erectus</i>                             | AY033384    |
| <i>E. bromicola</i>          | AL9633               | <i>Bro. erectus</i>                             | AY033385    |
| <i>E. bromicola</i>          | ATCC 200749          | <i>Bro. erectus</i>                             | L78289      |
| <i>E. bromicola</i>          | E502 = ATCC 200750   | <i>Bro. erectus</i>                             | KF042058    |
| <i>E. bromicola</i>          | DEB 9831/4           | <i>Bro. erectus</i>                             | AY033365    |
| <i>E. bromicola</i>          | ATCC 201558          | <i>Bro. ramosus</i>                             | KC936102    |
| <i>Epichloë canadensis</i>   | CWR 5                | <i>Elymus canadensis</i>                        | JN886778    |
|                              |                      |                                                 | JN886777    |
| <i>Epichloë clarkii</i>      | ATCC 200741          | <i>Holcus lanatus</i>                           | AF250738    |
| <i>E. clarkii</i>            | ATCC 200742          | <i>H. lanatus</i>                               | L78281      |
| <i>Epichloë elymi</i>        | E1081                | <i>Bromus kalmii</i>                            | AF457477    |
| <i>E. elymi</i>              | E56 = ATCC 201551    | <i>Elymus canadensis</i>                        | KF042052    |
| <i>E. elymi</i>              | ATCC 200850          | <i>Elymus virginicus</i>                        | L78273      |
| <i>E. elymi</i>              | ATCC 201553          | <i>El. virginicus</i>                           | AF062428    |
| <i>E. elymi</i>              | ATCC 201554          | <i>El. virginicus</i>                           | AF250742    |
| <i>E. elymi</i>              | ATCC 201556          | <i>Elymus hystrix</i>                           | AF250744    |
| <i>E. elymi</i>              | ATCC 201557          | <i>El. hystrix</i>                              | AF250745    |
| <i>E. elymi</i>              | E4132                | <i>El. hystrix</i>                              | AF457468    |
| <i>Epichloë festucae</i>     | E28                  | <i>Festuca trachyphylla</i>                     | L06956      |
| <i>E. festucae</i>           | ATCC 201550          | <i>Festuca rubra</i> subsp.<br><i>commutata</i> | L06957      |
| <i>E. festucae</i>           | ATCC 90660           | <i>F. rubra</i> subsp. <i>commutata</i>         | AF250746    |
| <i>E. festucae</i>           | ATCC 90661           | <i>F. rubra</i> subsp. <i>rubra</i>             | L06955      |
| <i>E. festucae</i>           | E1157                | <i>Koeleria pyramidata</i>                      | AF250747    |

Table S1. Cont.

| Species                   | Isolate <sup>a</sup> | Host                                         | tub2     |
|---------------------------|----------------------|----------------------------------------------|----------|
| <i>E. festucae</i>        | E434                 | <i>Lolium giganteum</i>                      | L78286   |
| <i>E. festucae</i>        | E2368                | <i>F. rubra</i> subsp. <i>rubra</i>          | KF042044 |
| <i>E. festucae</i>        | F11                  | <i>Festuca trachyphylla</i>                  | KF042045 |
| <i>Epichloë glyceriae</i> | E277 = ATCC 200747   | <i>Glyceria striata</i>                      | KF042046 |
| <i>E. glyceriae</i>       | E2772 = ATCC 200755  | <i>G. striata</i>                            | L78276   |
| <i>Epichloë poae</i>      | e187                 | <i>Poa secunda</i> subsp. <i>junicifolia</i> | JQ756453 |
| <i>E. poae</i>            | ATCC 201667          | <i>Poa nemoralis</i>                         | AF062429 |
| <i>E. poae</i>            | ATCC 201668          | <i>Poa nemoralis</i>                         | AF250756 |
| <i>E. poae</i>            | E5100                | <i>Poa nemoralis</i>                         | KC936115 |
| <i>E. poae</i>            | E5102                | <i>Poa nemoralis</i>                         | KC936114 |
| <i>E. poae</i>            | E5361                | <i>Poa nemoralis</i>                         | KC936113 |
| <i>E. poae</i>            | E5819                | <i>Poa nemoralis</i>                         | KF042043 |
| <i>E. poae</i>            | ATCC 201669          | <i>Poa pratensis</i>                         | L78284   |
| <i>E. poae</i>            | E1154 = CBS 102655   | <i>Poa pratensis</i>                         | AF250757 |
| <i>Epichloë sylvatica</i> | ATCC 200748          | <i>Brachypodium sylvaticum</i>               | L78278   |
| <i>E. sylvatica</i>       | ATCC 200751          | <i>Bp. sylvaticum</i>                        | L78291   |
| <i>E. sylvatica</i>       | Brhs6402             | <i>Bp. sylvaticum</i>                        | KC936106 |
| <i>E. sylvatica</i>       | Brhs6410             | <i>Bp. sylvaticum</i>                        | KC936107 |
| <i>E. sylvatica</i>       | Brhs6710             | <i>Bp. sylvaticum</i>                        | KC936108 |
| <i>E. sylvatica</i>       | Brhs6914             | <i>Bp. sylvaticum</i>                        | KC936109 |
| <i>Epichloë typhina</i>   | E7358                | <i>Achnatherum pekingensis</i>               | KC936101 |
| <i>E. typhina</i>         | ATCC 200738          | <i>Anthoxanthum odoratum</i>                 | L78288   |
| <i>E. typhina</i>         | TC1                  | <i>Brachypodium phoenicoides</i>             | AM490796 |
| <i>E. typhina</i>         | ATCC 200739          | <i>Brachypodium pinnatum</i>                 | L78292   |
| <i>E. typhina</i>         | E5232                | <i>Bp. pinnatum</i>                          | KC936111 |
| <i>E. typhina</i>         | E5240                | <i>Bp. pinnatum</i>                          | KC936105 |
| <i>E. typhina</i>         | E5303                | <i>Bp. pinnatum</i>                          | KC936112 |
| <i>E. typhina</i>         | E5319                | <i>Bp. pinnatum</i>                          | KC936110 |
| <i>E. typhina</i>         | ATCC 200740          | <i>Dactylis glomerata</i>                    | L78274   |
| <i>E. typhina</i>         | E5261                | <i>D. glomerata</i>                          | KC936130 |
| <i>E. typhina</i>         | E5268                | <i>D. glomerata</i>                          | KC936128 |
| <i>E. typhina</i>         | E5272                | <i>D. glomerata</i>                          | KC936121 |
| <i>E. typhina</i>         | E5333                | <i>D. glomerata</i>                          | KC936132 |
| <i>E. typhina</i>         | E5347                | <i>D. glomerata</i>                          | KC936124 |
| <i>E. typhina</i>         | E5350                | <i>D. glomerata</i>                          | KC936118 |
| <i>E. typhina</i>         | E5070                | <i>D. glomerata</i>                          | KC936122 |
| <i>E. typhina</i>         | E5071                | <i>D. glomerata</i>                          | KC936139 |
| <i>E. typhina</i>         | E5075                | <i>D. glomerata</i>                          | KC936119 |
| <i>E. typhina</i>         | E5076                | <i>D. glomerata</i>                          | KC936129 |
| <i>E. typhina</i>         | E5077                | <i>D. glomerata</i>                          | KC936140 |
| <i>E. typhina</i>         | E5078                | <i>D. glomerata</i>                          | KC936136 |
| <i>E. typhina</i>         | E5079                | <i>D. glomerata</i>                          | KC936141 |
| <i>E. typhina</i>         | E5084                | <i>D. glomerata</i>                          | KC936134 |
| <i>E. typhina</i>         | E5088                | <i>D. glomerata</i>                          | KC936116 |
| <i>E. typhina</i>         | E5089                | <i>D. glomerata</i>                          | KC936137 |

Table S1. Cont.

| Species                                                       | Isolate <sup>a</sup> | Host                                                  | tub2     |
|---------------------------------------------------------------|----------------------|-------------------------------------------------------|----------|
| <i>E. typhina</i>                                             | E5090                | <i>D. glomerata</i>                                   | KC936142 |
| <i>E. typhina</i>                                             | E5092                | <i>D. glomerata</i>                                   | KC936120 |
| <i>E. typhina</i>                                             | E5094                | <i>D. glomerata</i>                                   | KC936138 |
| <i>E. typhina</i>                                             | E5096                | <i>D. glomerata</i>                                   | KC936133 |
| <i>E. typhina</i>                                             | E5142                | <i>D. glomerata</i>                                   | KC936123 |
| <i>E. typhina</i>                                             | E5143                | <i>D. glomerata</i>                                   | KC936131 |
| <i>E. typhina</i>                                             | E5146                | <i>D. glomerata</i>                                   | KC936127 |
| <i>E. typhina</i>                                             | E5159                | <i>D. glomerata</i>                                   | KC936135 |
| <i>E. typhina</i>                                             | E8 = ATCC 200736     | <i>Lolium perenne</i> subsp. <i>perenne</i>           | X52616   |
| <i>E. typhina</i>                                             | E432                 | <i>L. perenne</i> subsp. <i>perenne</i>               | AF250752 |
| <i>E. typhina</i>                                             | ATCC 200851          | <i>Phleum pratense</i>                                | L78280   |
| <i>E. typhina</i>                                             | CBS 102658           | <i>Phleum pratense</i>                                | AF250753 |
| <i>E. typhina</i>                                             | E348 = CBS 102648    | <i>Phleum pratense</i>                                | L78277   |
| <i>E. typhina</i>                                             | E5001                | <i>Poa trivialis</i>                                  | KC936103 |
| <i>E. typhina</i>                                             | E5002                | <i>Poa trivialis</i>                                  | KC936104 |
| <i>E. typhina</i>                                             | AL0525/2             | <i>Puccinellia distans</i>                            | EU375739 |
| <i>E. typhina</i>                                             | AL9725               | <i>Puc. distans</i>                                   | EU375740 |
| <i>E. typhina</i> (syn. <i>E. poae</i> ) var. <i>aonikenk</i> | Bs420                | <i>Bromus setifolius</i>                              | AY707694 |
| <i>E. yangzii</i>                                             | Rnj4201              | <i>Roegneria kamoji</i>                               | DQ134039 |
| <i>Epichloë</i> sp.                                           | E3601 = AL9924       | <i>Holcus mollis</i>                                  | KF042061 |
| FaTG-2 (G2)                                                   | NFe45079             | <i>Lolium arundinaceum</i>                            | X028253  |
|                                                               |                      |                                                       | JX028254 |
| FaTG-2 (G3)                                                   | NFe45115             | <i>L. arundinaceum</i>                                | JX028255 |
|                                                               |                      |                                                       | JX028256 |
| FaTG-3                                                        | e4074                | <i>Lolium</i> sp.                                     | L20308   |
|                                                               |                      |                                                       | L06952   |
| FaTG-3                                                        | NFe1100              | <i>Lolium</i> sp.                                     | KF030703 |
|                                                               |                      |                                                       | KF030704 |
| FaTG-4                                                        | e4305                | <i>Festuca arundinacea</i> var. <i>letourneuxiana</i> | KC936117 |
|                                                               |                      |                                                       | KC936143 |
| <i>N. aotearoae</i>                                           | MYA-1193             | <i>Echinopogon ovatus</i>                             | AF323371 |
| <i>N. aotearoae</i>                                           | e899 = MYA-1229      | <i>Ec. ovatus</i>                                     | KF042049 |
| <i>N. chisosum</i>                                            | e3609 = ATCC 64037   | <i>Achnatherum eminens</i>                            | AF457470 |
|                                                               |                      |                                                       | AF457471 |
|                                                               |                      |                                                       | AF457472 |
| <i>N. coenophialum</i>                                        | e19 = ATCC 90664     | <i>Lolium arundinaceum</i>                            | KF036272 |
|                                                               |                      |                                                       | KF036273 |
|                                                               |                      |                                                       | KF036274 |
| <i>N. coenophialum</i>                                        | e4163                | <i>L. arundinaceum</i>                                | KF036275 |
|                                                               |                      |                                                       | KF036276 |
|                                                               |                      |                                                       | KF036277 |
| <i>N. coenophialum</i>                                        | e4309                | <i>L. arundinaceum</i>                                | KF036278 |
|                                                               |                      |                                                       | KF036279 |
|                                                               |                      |                                                       | KF036280 |

Table S1. Cont.

| Species                                         | Isolate <sup>a</sup>     | Host                                          | tub2                 |
|-------------------------------------------------|--------------------------|-----------------------------------------------|----------------------|
| <i>N. funkii</i>                                | e4096                    | <i>Achnatherum robustum</i>                   | AF457489<br>AF457490 |
| <i>N. gansuense</i>                             | e7080                    | <i>Achnatherum inebrians</i>                  | KF042053             |
| <i>N. gansuense</i>                             | e7082                    | <i>A. inebrians</i>                           | EF422757             |
| <i>N. gansuense</i>                             | e7083                    | <i>A. inebrians</i>                           | EF422759             |
| <i>N. gansuense</i>                             | e7084                    | <i>A. inebrians</i>                           | EF422758             |
| <i>N. gansuense</i>                             | e7085                    | <i>A. inebrians</i>                           | EF422760             |
| <i>N. gansuense</i>                             | e7086                    | <i>A. inebrians</i>                           | EF422761             |
| <i>N. gansuense</i>                             | e7087                    | <i>A. inebrians</i>                           | EF422762             |
| <i>N. gansuense</i>                             | e7088                    | <i>A. inebrians</i>                           | EF422763             |
| <i>N. gansuense</i>                             | e7090                    | <i>A. inebrians</i>                           | EF422764             |
| <i>N. gansuense</i>                             | e7092                    | <i>A. inebrians</i>                           | EF422765             |
| <i>N. gansuense</i> var.<br><i>inebrians</i>    | e817                     | <i>A. inebrians</i>                           | AF457495             |
| <i>N. gansuense</i> var.<br><i>inebrians</i>    | e818 = ATCC MYA-<br>1228 | <i>A. inebrians</i>                           | KF042059             |
| <i>N. lolii</i>                                 | e135 = Lp19              | <i>Lolium perenne</i>                         | KC936144             |
| <i>N. lolii</i> x <i>E. typhina</i><br>(LpTG-2) | e144 = Lp1               | <i>L. perenne</i>                             | L20304<br>L78286     |
| <i>N. occultans</i>                             | Lm2                      | <i>Lolium multiflorum</i>                     | AF176268<br>AF176274 |
| <i>N. occultans</i>                             | Lrr1                     | <i>L. rigidum</i> var. <i>rigidum</i>         | AF176271<br>AF176275 |
| <i>N. occultans</i>                             | Lrr2                     | <i>L. rigidum</i> var. <i>rigidum</i>         | AF176270<br>AF176276 |
| <i>N. occultans</i>                             | e992                     | <i>L. rigidum</i> var. <i>rigidum</i>         | AF176271<br>AF176275 |
| <i>N. occultans</i>                             | Lro1                     | <i>L. rigidum</i> var. <i>rottboellioides</i> | AF176269<br>AF176272 |
| <i>N. sibiricum</i>                             | MTI-H50                  | <i>Achnatherum sibiricum</i>                  | GQ421698             |
| <i>N. sibiricum</i>                             | MTI-X47                  | <i>A. sibiricum</i>                           | GQ421706             |
| <i>N. sibiricum</i>                             | MTI-X85                  | <i>A. sibiricum</i>                           | GQ421707             |
| <i>N. sibiricum</i>                             | A-LB                     | <i>A. sibiricum</i>                           | DQ675589             |
| <i>N. siegelii</i>                              | E915 = ATCC 74483        | <i>Lolium pratense</i>                        | AF308138<br>AF308139 |
| <i>N. stromatolungum</i>                        | Cnj6617                  | <i>Calamagrostis epigeios</i>                 | EU526824             |
| <i>N. stromatolungum</i>                        | Cnj6620                  | <i>C. epigeios</i>                            | EU526825             |
| <i>N. uncinatum</i>                             | E167 = CBS 102646        | <i>L. pratense</i>                            | KF042048             |
| PauTG-1                                         | e55                      | <i>Poa autumnalis</i>                         | AF457473<br>AF457474 |

<sup>a</sup> Strain designations beginning ATCC or MYA are from the American Type Culture Collection, strain designations beginning CBS are from the Centraalbureau voor Schimmelcultures, and other designations are from the laboratories where the strains were isolated.

**Table S2.** GenBank accession numbers for alkaloid biosynthesis genes.<sup>a</sup>

| Organism                          | Strain              | EAS                                                          | IDT/LTM                            | LOL                                                          |
|-----------------------------------|---------------------|--------------------------------------------------------------|------------------------------------|--------------------------------------------------------------|
| <i>Epichloë amarillans</i>        | E57 = ATCC 200744   | -                                                            | -                                  | JF830812,<br>JF830813                                        |
| <i>E. amarillans</i>              | E4668               | KC989564,<br>KC989563                                        | -                                  | KC990436                                                     |
| <i>Epichloë baconii</i>           | E1031 = ATCC 200745 | KC989571                                                     | -                                  | KC990439,<br>KC990440                                        |
| <i>Epichloë brachyelytri</i>      | E4804               | JN378894,<br>JN378895,<br>JN378896                           | -                                  | JF800660,<br>JF800661,<br>JF800659                           |
| <i>Epichloë bromicola</i>         | E502 = ATCC 200750  | -                                                            | -                                  | -                                                            |
| <i>Epichloë canadensis</i>        | e4815               | KC989568,<br>KC989567,<br>KC989566,<br>KC989565,<br>KC989612 | -                                  | KC990447,<br>KC990443,<br>KC990444,<br>KC990445,<br>KC990446 |
| <i>E. canadensis</i> <sup>b</sup> | CWR 5               | KC989604,<br>KC989603,<br>KC989602                           | -                                  | KC969638,<br>KC969639,<br>KC969640                           |
| <i>E. canadensis</i> <sup>b</sup> | CWR 34              | KC989606,<br>KC989605                                        | -                                  | KC969635,<br>KC969636,<br>KC969637                           |
| <i>Epichloë elymi</i>             | E56 = ATCC 201551   | JX439640,<br>JX439641,<br>JX439642                           | -                                  | -                                                            |
| <i>Epichloë festucae</i>          | E2368               | JN167225,<br>JN167226,<br>JN167227                           | JX402753                           | JF830815,<br>JF830814,<br>JF830816                           |
| <i>Epichloë festucae</i>          | Fl1                 | JN177500,<br>JN177501,<br>JN177502                           | JN613318,<br>JN613319,<br>JN613320 | -                                                            |
| <i>Epichloë glyceriae</i>         | E277 = ATCC 200747  | JN177503,<br>JN177504,<br>JN177505,<br>JN177506              | -                                  | JF800664,<br>JF800665,<br>JF800663                           |
| <i>Epichloë</i> sp.               | E3601 = AL9924      | KC989574,<br>KC989573,<br>KC989572,                          | -                                  | -                                                            |
| <i>Epichloë poae</i>              | E4646               | -                                                            | -                                  | -                                                            |
| <i>E. poae</i>                    | E5819               | JN182230,<br>JN182231,<br>JN182232                           | -                                  | -                                                            |
| <i>Epichloë typhina</i>           | E8 = ATCC 200736    | -                                                            | -                                  | -                                                            |

Table S2. Cont.

| Organism                                                         | Strain   | EAS                                                                                    | IDT/LTM                                         | LOL                                                          |
|------------------------------------------------------------------|----------|----------------------------------------------------------------------------------------|-------------------------------------------------|--------------------------------------------------------------|
| <i>Neotyphodium</i> sp. FaTG-2,<br>G2 genotype <sup>b</sup>      | NFe45079 | KC989601,                                                                              | KC970517,                                       | -                                                            |
|                                                                  |          | KC989600,                                                                              | KC970518,                                       |                                                              |
|                                                                  |          | KC989599,                                                                              | KC970523,                                       |                                                              |
|                                                                  |          | KC989598,                                                                              | KC970524,                                       |                                                              |
|                                                                  |          | KC989597,                                                                              | KC970528,                                       |                                                              |
|                                                                  |          | KC989596,                                                                              | KC970529,                                       |                                                              |
|                                                                  |          | KC989595,                                                                              | KC970541,                                       |                                                              |
|                                                                  |          | KC989594,                                                                              | KC970544,                                       |                                                              |
|                                                                  |          | KC989593,                                                                              | KC970545,                                       |                                                              |
|                                                                  |          | KC989592                                                                               | KC970552,                                       |                                                              |
|                                                                  |          |                                                                                        | KC970553,                                       |                                                              |
|                                                                  |          |                                                                                        | KC970560,                                       |                                                              |
|                                                                  |          |                                                                                        | KC970561,                                       |                                                              |
|                                                                  |          |                                                                                        | KC970562,                                       |                                                              |
|                                                                  |          |                                                                                        | KC970563,                                       |                                                              |
|                                                                  |          |                                                                                        | KC970570,                                       |                                                              |
| <i>Neotyphodium</i> sp. FaTG-2,<br>G3 genotype <sup>b</sup>      | NFe45115 | KC989591,                                                                              | KC970525,                                       | -                                                            |
|                                                                  |          | KC989590,                                                                              | KC970530,                                       |                                                              |
|                                                                  |          | KC989589,                                                                              | KC970536,                                       |                                                              |
|                                                                  |          | KC989588,                                                                              | KC970540,                                       |                                                              |
|                                                                  |          | KC989587,                                                                              | KC970543,                                       |                                                              |
|                                                                  |          | KC989586,                                                                              | KC970551,                                       |                                                              |
|                                                                  |          | KC989585                                                                               | KC970559,                                       |                                                              |
|                                                                  |          |                                                                                        | KC970564,                                       |                                                              |
| <i>Neotyphodium</i> sp. FaTG-3 <sup>b</sup>                      | NFe1100  | -                                                                                      | KC970567                                        | KC969615,<br>KC969616,<br>KC969617,<br>KC969618,<br>KC969619 |
|                                                                  |          |                                                                                        | KC970522,                                       |                                                              |
|                                                                  |          |                                                                                        | KC970527,                                       |                                                              |
|                                                                  |          |                                                                                        | KC970535,                                       |                                                              |
|                                                                  |          |                                                                                        | KC970539,                                       |                                                              |
|                                                                  |          |                                                                                        | KC970546,                                       |                                                              |
|                                                                  |          |                                                                                        | KC970550,                                       |                                                              |
|                                                                  |          |                                                                                        | KC970558,                                       |                                                              |
| <i>Neotyphodium</i> sp. FaTG-3<br><i>Neotyphodium</i> sp. FaTG-4 | e4074    | -                                                                                      | -                                               | KF027206                                                     |
|                                                                  | e4305    | KC989581,<br>KC989580,<br>KC989579,<br>KC989578,<br>KC989577,<br>KC989576,<br>KC989575 | KC970537,<br>KC970573,<br>KC970582,<br>KC970579 | -                                                            |

Table S2. Cont.

| Organism                                  | Strain                                                                      | EAS                                                          | IDT/LTM                                                                                             | LOL                                                           |
|-------------------------------------------|-----------------------------------------------------------------------------|--------------------------------------------------------------|-----------------------------------------------------------------------------------------------------|---------------------------------------------------------------|
| <i>Neotyphodium aotearoae</i>             | e899 = MYA-1229                                                             | -                                                            | KC970519,<br>KC970555,<br>KC970574,<br>KC970575,<br>KC970576,<br>KC970577                           | KC990449,<br>KC990451,<br>KC990450,<br>KC990448,              |
| <i>Neotyphodium chisosum</i>              | e3609 = ATCC 64037                                                          | -                                                            | -                                                                                                   | KC990454,<br>KC990455,<br>KC990452,<br>KC990453,<br>KC990456, |
| <i>Neotyphodium coenophialum</i>          | e19 = ATCC 90664                                                            | KC989611,<br>KC989610,<br>KC989609,<br>KC989608,<br>KC989607 | KC970554                                                                                            | EF012268<br>KF027203,<br>KF027204,<br>KF027205                |
| <i>N. coenophialum</i>                    | e4163                                                                       | KC989570,<br>KC989569                                        | KC970578                                                                                            | KC990458,<br>KC990457,<br>KC990459                            |
| <i>N. coenophialum</i>                    | e4309                                                                       | -                                                            | KC970572,<br>KC970581,<br>KC970584                                                                  | KC990460,<br>KC990462,<br>KC990461                            |
| <i>Neotyphodium funkii</i>                | e4096                                                                       | KF042039,<br>KF042040,<br>KF042041                           | KC920437,<br>KC920438                                                                               | -                                                             |
| <i>Neotyphodium gansuense</i>             | e7080                                                                       | -                                                            | JN587271                                                                                            | JF800666                                                      |
| <i>N. gansuense</i> var. <i>inebrians</i> | e818 = MYA-1228                                                             | JX072969,<br>JX273434                                        | JX072969                                                                                            | -                                                             |
| <i>Neotyphodium occultans</i>             | e999                                                                        | nd                                                           | nd                                                                                                  | KF039908                                                      |
| <i>N. occultans</i> <sup>b</sup>          | Non-culturable<br>From <i>Lolium</i><br><i>temulentum</i> GRIN PI<br>415813 | -                                                            | KC970520,<br>KC970531,<br>KC970532,<br>KC970533,<br>KC970547,<br>KC970548,<br>KC970557,<br>KC970566 | KC969629,<br>KC969630,<br>KC969631,<br>KC969632,<br>KC969633  |

Table S2. Cont.

| Organism                                  | Strain            | EAS                                             | IDT/LTM                                                                                            | LOL                                                          |
|-------------------------------------------|-------------------|-------------------------------------------------|----------------------------------------------------------------------------------------------------|--------------------------------------------------------------|
| <i>Neotyphodium siegelii</i> <sup>b</sup> | e915 = ATCC 74483 | -                                               | KC970521,<br>KC970526,<br>KC970534,<br>KC970538,<br>KC970542,<br>KC970569<br>KC970549,<br>KC970556 | KC969627,<br>KC969624,<br>KC969625,<br>KC969626,<br>KC969628 |
| <i>Neotyphodium uncinatum</i>             | e167 = CBS 102646 | -                                               | -                                                                                                  | AY723749,<br>AY723750,<br>AY724686,<br>JX430081,<br>JX430082 |
| <i>Neotyphodium lolii</i>                 | e135 = Lp19       | EF125025                                        | AY742903,<br>DQ443465                                                                              | -                                                            |
| <i>N. lolii</i> x <i>E. typhina</i>       | e144 = Lp1        | KC989584,<br>KC989583,<br>KC989613,<br>KC989582 | KC970580,<br>KC970583                                                                              | -                                                            |
| <i>Neotyphodium</i> sp. PauTG-1           | e55               | -                                               | -                                                                                                  | EF012269,<br>EF015399                                        |

<sup>a</sup> nd = not determined; - = absent; <sup>b</sup> Data generated through amplicon sequencing.

© 2013 by the authors; licensee MDPI, Basel, Switzerland. This article is an open access article distributed under the terms and conditions of the Creative Commons Attribution license (<http://creativecommons.org/licenses/by/3.0/>).
